# Supplementary material
Source: ML conference proceedings conference paper supplement (https://proceedings.mlr.press/v139/vreugdenhil21a.html)
Supplement: Supplementary file 1 [file vreugdenhil21a-supp.pdf]

# Supplementary Material

## Principal Component Hierarchy for Sparse Quadratic Programs

### A Additional Numerical Experiments

#### A.1 Comparison of Computational Time to warm start

We study the impact of the sample size  $N$  on the recovery quality of the solution. We fix  $n = 1000$ ,  $s = 10$ ,  $\rho = 0.5$ ,  $\text{SNR} = 6$  and  $\eta = 10$ . We showcase the computational time of our methods and of the **warm start** in Figure A, the computational time is defined as the time needed to generate  $x^*$ . Note that the **BR** method uses MOSEK to obtain the solution to  $x^*$  because it does not converge to a single set  $z$  for  $\eta = 10$ , so the solver time is also included in the computational time. We run the **BR** method for  $T_{\text{BR}} = 20$  iterations, and we run the **DP** method for  $T_{\text{DP}} = 500$  iterations.

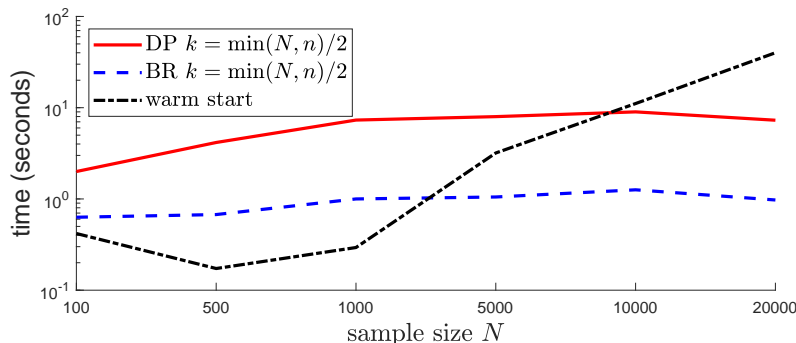

Figure A: Computational time over different sample sizes averaged over 25 replications

We observe that the computational time of the **DP** method increases monotonically with the sample size  $N$ . Note that  $T_{\text{BR}} \ll T_{\text{DP}}$  so calculating  $Z_{\text{BR}}$  requires less time than  $Z_{\text{DP}}$ . We observe that when  $N = 100$  the **BR** and the **warm start** have a higher computational time than for  $N = 500$ . For the **BR**, this is because the number of non-zero elements in  $Z$  (i.e.,  $\|Z\|_0$ ) is larger for  $N = 100$  than for  $N = 500$ , hence MOSEK takes more time for  $N = 100$ . The MSE of all methods is similar when  $N \geq 500$ , when  $N = 100$  the MSE of all methods differs significantly at every instance. This is also observed by Bertsimas & van Parys (2017), which states that the computational time and MSE deteriorate as  $N$  gets smaller relative to  $n$ .

We observe that **BR** and **DP** perform particularly well in terms of computational time in ranges where  $N > n$  compared to the **warm start**. The running time of our method is less susceptible to the number of samples  $N$ . This is in stark contrast to the **warm start**, in which the kernel matrix of dimension  $N$ -by- $N$  is stored.

#### A.2 Comparison for Different SNR and $s$

We extend the comparison made in the paper for different values of SNR and  $s$ . In Table A and B we observe that the MSE over different SNR and  $s$  is very similar for all methods. This is due to the fact that all methods find a

Table A: MSE over different SNR averaged over 25 independent replications. Lower is better.

|            | DP $k = 400$ | BR $k = 400$ | warm start | Beck Alg 7 | KDD     |
|------------|--------------|--------------|------------|------------|---------|
| SNR = 20   | 0.588        | 0.588        | 0.588      | 0.588      | 0.588   |
| SNR = 6    | 1.767        | 1.767        | 1.767      | 1.767      | 1.767   |
| SNR = 3    | 3.452        | 3.452        | 3.452      | 3.452      | 3.452   |
| SNR = 1    | 10.190       | 10.190       | 10.190     | 10.198     | 10.205  |
| SNR = 0.05 | 194.592      | 194.561      | 194.560    | 194.756    | 199.928 |

Table B: MSE over different  $s$  averaged over 25 independent replications. Lower is better.

|          | DP $k = 400$ | BR $k = 400$ | warm start | Beck Alg 7 | KDD   |
|----------|--------------|--------------|------------|------------|-------|
| $s = 5$  | 0.887        | 0.887        | 0.887      | 0.887      | 0.887 |
| $s = 10$ | 1.767        | 1.767        | 1.767      | 1.767      | 1.767 |
| $s = 20$ | 3.435        | 3.435        | 3.435      | 3.557      | 3.450 |
| $s = 30$ | 5.050        | 5.050        | 5.058      | 5.888      | 5.440 |
| $s = 40$ | 6.919        | 6.928        | 6.918      | 8.290      | 8.560 |

similar support  $z^*$ . Using this support all problems solve the same convex quadratic programming problem. We also observe that the reduced size  $\|Z_{\text{BR}}\|_0 \approx 2s$  and  $\|Z_{\text{DP}}\|_0 \approx s$ . So as the problem in  $(\mathcal{P}_Z)$  increases with  $s$ , MOSEK takes more time to solve  $(\mathcal{P}_Z)$  and because  $\|Z_{\text{BR}}\|_0 > \|Z_{\text{DP}}\|_0$  the DP is faster for large  $s$ .

### A.3 Real Datasets

For the real datasets listed in the main paper, we present the out-sample MSE for the different methods in Table C.

Table C: Out-sample MSE on real datasets, averaged over 50 independent train-test splits. Lowest error for each dataset is highlighted in grey.

|      | DP $k = 40$                              | DP $k = \hat{k}$       | BR $k = 40$            | BR $k = \hat{k}$                         | warm start             | screening                                | BH Alg 7               | KDD                    |
|------|------------------------------------------|------------------------|------------------------|------------------------------------------|------------------------|------------------------------------------|------------------------|------------------------|
| (FB) | $3.026 \times 10^{-4}$                   | $3.025 \times 10^{-4}$ | $3.022 \times 10^{-4}$ | <b><math>3.020 \times 10^{-4}</math></b> | out of memory          | $3.022 \times 10^{-4}$                   | $3.203 \times 10^{-4}$ | $3.409 \times 10^{-4}$ |
| (ON) | <b><math>1.796 \times 10^{-4}</math></b> | $1.797 \times 10^{-4}$ | $1.797 \times 10^{-4}$ | $1.797 \times 10^{-4}$                   | $1.797 \times 10^{-4}$ | $1.797 \times 10^{-4}$                   | $1.803 \times 10^{-4}$ | $1.803 \times 10^{-4}$ |
| (SC) | $1.263 \times 10^{-2}$                   | $1.263 \times 10^{-2}$ | $1.398 \times 10^{-2}$ | $1.370 \times 10^{-2}$                   | $1.326 \times 10^{-2}$ | <b><math>1.257 \times 10^{-2}</math></b> | $1.454 \times 10^{-2}$ | $1.473 \times 10^{-2}$ |
| (CR) | $2.892 \times 10^{-2}$                   | $2.891 \times 10^{-2}$ | $2.893 \times 10^{-2}$ | $2.894 \times 10^{-2}$                   | $2.900 \times 10^{-2}$ | <b><math>2.868 \times 10^{-2}</math></b> | $3.103 \times 10^{-2}$ | $3.148 \times 10^{-2}$ |
| (UJ) | <b><math>2.149 \times 10^{-2}</math></b> | $2.324 \times 10^{-2}$ | $2.684 \times 10^{-2}$ | $2.691 \times 10^{-2}$                   | $2.468 \times 10^{-2}$ | $2.291 \times 10^{-2}$                   | $3.848 \times 10^{-2}$ | $3.080 \times 10^{-2}$ |

Similar to the in-sample MSE, Table C shows that DP delivers a lower out-sample MSE than BR in 4 out of 5 datasets, and DP also has a lower out-sample MSE than the **warm start**, **BH Alg 7** and **KDD** for all datasets. The **screening** method outperforms the DP on the (SC) and (CR) dataset, however as explained in the main paper for  $\eta = \sqrt{N_{\text{train}}}$  the result of **screening** in Table C on the (SC) and (CR) datasets is essentially the results obtained by applying the MOSEK solver to the original problem (reaching a time limit of 300 seconds).

## B Proof of Proposition 3.1

We provide the proof of Proposition 3.1, which is not included in the main paper.

*Proof.* Using the big- $M$  equivalent formulation, we have

$$\begin{aligned}
 \mathcal{J}_k^* = \min_{\substack{z \in \{0,1\}^n \\ \sum z_j \leq s}} \min & \sum_{i=1}^k \lambda_i y_i^2 + \langle c, x \rangle + \eta^{-1} \|x\|_2^2 \\
 \text{s.t.} & x \in \mathbb{R}^n, y \in \mathbb{R}^k \\
 & \sqrt{\lambda_i} y_i = \sqrt{\lambda_i} \langle v_i, x \rangle & i \in [k] \\
 & |x_j| \leq M z_j & j \in [n] \\
 & Ax \leq b.
 \end{aligned}$$

Fix a feasible solution for  $z$  and consider the inner minimization problem. By associating the first two constraints with the dual variables  $\alpha$  and  $\beta$ , the Lagrangian function is defined as

$$\begin{aligned}\mathcal{L}(x, y, \alpha, \beta) &= \sum_{i=1}^k \lambda_i y_i^2 + \langle c, x \rangle + \eta^{-1} \|x\|_2^2 + \sum_{i=1}^k \alpha_i \sqrt{\lambda_i} (\langle v_i, x \rangle - y_i) + \beta^\top (Ax - b) \\ &= -\beta^\top b + y^\top \Lambda y - \alpha^\top \sqrt{\Lambda} y + \left\langle c + V\sqrt{\Lambda}\alpha + A^\top \beta, x \right\rangle + \eta^{-1} \|x\|_2^2,\end{aligned}$$

in which  $\Lambda = \text{diag}\{\lambda_1, \dots, \lambda_k\}$ . For any feasible solution  $z$ , the inner minimization problem is a convex quadratic optimization problem and we have

$$\mathcal{J}_k^* = \min_{\substack{z \in \{0,1\}^n \\ \sum z_j \leq s}} \max_{\substack{\alpha \in \mathbb{R}_+^k \\ \beta \in \mathbb{R}_+^m}} L(z, \alpha, \beta),$$

where the objective function  $L$  is defined as

$$L(z, \alpha, \beta) := -\beta^\top b + \min_{y \in \mathbb{R}^k} y^\top \Lambda y - \alpha^\top \sqrt{\Lambda} y + \min_{\substack{x \in \mathbb{R}^n \\ |x_j| \leq Mz_j \ \forall j}} \left\langle c + V\sqrt{\Lambda}\alpha + A^\top \beta, x \right\rangle + \eta^{-1} \|x\|_2^2.$$

We will reformulate the two optimization subproblems in the definition of  $L$ . For any feasible pair  $\beta \in \mathbb{R}_+^m$  and  $\alpha \in \mathbb{R}^k$ , the subproblem over  $y$  is an unconstrained convex quadratic optimization problem. The corresponding optimal solution for  $y$  is

$$y^*(\alpha, \beta) = \frac{1}{2}(\sqrt{\Lambda})^{-1}\alpha.$$

Consequently, the optimal value of the  $y$ -subproblem is given by

$$\min_{y \in \mathbb{R}^k} y^\top \Lambda y - \alpha^\top \sqrt{\Lambda} y = -\frac{1}{4} \|\alpha\|_2^2.$$

Next, consider the  $x$ -subproblem. Let  $\gamma := c + V\sqrt{\Lambda}\alpha + A^\top \beta$  and let  $\gamma_j$  denote the  $j$ -th element of  $\gamma$ . The big- $M$  equivalent formulation for the  $x$ -subproblem admits the form

$$\min_{\substack{x \in \mathbb{R}^n \\ |x_j| \leq Mz_j \ \forall j}} \sum_{j=1}^n \gamma_j x_j + \frac{x_j^2}{\eta} = \sum_{j=1}^n \min_{\substack{x \in \mathbb{R}^n \\ |x_j| \leq Mz_j \ \forall j}} \gamma_j x_j + \frac{x_j^2}{\eta} = \sum_{j=1}^n -\frac{\eta}{4} \gamma_j^2 z_j,$$

where the last equality exploits the fact that the optimal solution of  $x_j$  is

$$x_j^*(z_j) = \begin{cases} -\frac{\eta}{2} \gamma_j & \text{if } z_j = 1, \\ 0 & \text{if } z_j = 0. \end{cases}$$

We thus have

$$L(z, \alpha, \beta) = -\beta^\top b - \frac{1}{4} \sum_{i=1}^k \alpha_i^2 - \sum_{j=1}^n \frac{\eta}{4} \gamma_j^2 z_j,$$

where  $\gamma = c + V\sqrt{\Lambda}\alpha + A^\top \beta$  and  $\gamma_j$  is the  $j$ -th element of  $\gamma$ . Rewriting the summations using norm and matrix multiplications completes the proof.  $\square$

## C Principal Component Hierarchy for Sparsity-Penalized Quadratic Programs

The approach proposed in the main paper can be extended to solve the  $\|\cdot\|_0$ -penalized problem of the form

$$\begin{aligned}\min & \quad \langle c, x \rangle + \langle x, Qx \rangle + \eta^{-1} \|x\|_2^2 + \theta \|x\|_0 \\ \text{s.t.} & \quad x \in \mathbb{R}^n, Ax \leq b\end{aligned}$$

for some sparsity-inducing parameter  $\theta > 0$ . The corresponding approximation using  $k$  principal components of the matrix  $Q$  is

$$\begin{aligned} \mathcal{U}_k^* \triangleq \min \quad & \langle c, x \rangle + \sum_{i=1}^k \lambda_i y_i^2 + \eta^{-1} \|x\|_2^2 + \theta \|x\|_0 \\ \text{s.t.} \quad & x \in \mathbb{R}^n, y \in \mathbb{R}^k \\ & Ax \leq b \\ & \sqrt{\lambda_i} y_i = \sqrt{\lambda_i} \langle v_i, x \rangle \quad i \in [k]. \end{aligned} \tag{W}_k$$

**Proposition C.1** (Min-max characterization). *For each  $k \leq n$ , the optimal value of problem (W<sub>k</sub>) is equal to*

$$\mathcal{U}_k^* = \min_{z \in \{0,1\}^n} \max_{\substack{\alpha \in \mathbb{R}^k \\ \beta \in \mathbb{R}_+^m}} H(z, \alpha, \beta),$$

where the objective function  $H$  is defined as

$$H(z, \alpha, \beta) \triangleq \theta \sum_{j=1}^n z_j - \beta^\top b - \frac{1}{4} \|\alpha\|_2^2 - \frac{\eta}{4} (c + V\sqrt{\Lambda}\alpha + A^\top \beta)^\top \text{diag}(z) (c + V\sqrt{\Lambda}\alpha + A^\top \beta). \tag{C.1}$$

*Proof of Proposition C.1.* The sparsity-penalized principal component approximation problem can be rewritten using the big- $M$  formulation as

$$\begin{aligned} \min_{z \in \{0,1\}^n} \min \quad & \langle c, x \rangle + \sum_{i=1}^k \lambda_i y_i^2 + \eta^{-1} \|x\|_2^2 + \theta \sum_{j=1}^n z_j \\ \text{s.t.} \quad & x \in \mathbb{R}^n, y \in \mathbb{R}^k \\ & \sqrt{\lambda_i} y_i = \sqrt{\lambda_i} \langle v_i, x \rangle \quad i \in [k] \\ & |x_j| \leq M z_j \quad j \in [n] \\ & Ax \leq b. \end{aligned}$$

For any feasible solution  $z$ , the inner minimization problem is a convex quadratic optimization problem. By strong duality, we have the equivalent problem

$$\mathcal{U}_k^* = \min_{z \in \{0,1\}^n} \max_{\substack{\alpha \in \mathbb{R}^k \\ \beta \in \mathbb{R}_+^m}} H(z, \alpha, \beta),$$

where the objective function  $H$  is

$$H(z, \alpha, \beta) = -\beta^\top b + \min_{y \in \mathbb{R}^k} y^\top \sqrt{\Lambda} y - \alpha^\top \text{diag}(\sqrt{\Lambda}) y + \min_{\substack{x \in \mathbb{R}^n \\ |x_j| \leq M z_j \quad \forall j}} \left\langle c + V \text{diag}(\sqrt{\Lambda}) \alpha + A^\top \beta, x \right\rangle + \eta^{-1} \|x\|_2^2 + \theta \sum_{j=1}^n z_j.$$

Following proposition 3.1 we can calculate the optimal values for  $y^*$  and  $x^*$ . Considering the  $x$ -subproblem, let  $\gamma = c + V\sqrt{\Lambda}\alpha + A^\top \beta$  and  $\gamma_j$  be the  $j$ -th element of  $\gamma$ . The big- $M$  equivalent formulation for the  $x$ -subproblem admits the form

$$\begin{aligned} \min_{\substack{x \in \mathbb{R}^n \\ |x_j| \leq M z_j \quad \forall j}} \sum_{j=1}^n \gamma_j x_j + \frac{x_j^2}{\eta} + \theta z_j &= \sum_{j=1}^n \min_{\substack{x \in \mathbb{R}^n \\ |x_j| \leq M z_j \quad \forall j}} \gamma_j x_j + \frac{x_j^2}{\eta} + \theta z_j \\ &= \sum_{j=1}^n \left( -\frac{\eta}{4} \gamma_j^2 + \theta \right) z_j, \end{aligned} \tag{C.2}$$

where the last equality exploits the fact that the optimal solution of  $x_j$  is

$$x_j^*(z_j) = \begin{cases} -\frac{\eta}{2} \gamma_j & \text{if } \frac{\eta}{4} \gamma_j^2 > \theta, \\ 0 & \text{if } \frac{\eta}{4} \gamma_j^2 \leq \theta. \end{cases}$$

As a consequence, we have

$$H(z, \alpha, \beta) = -\beta^\top b - \frac{1}{4} \sum_{i=1}^k \alpha_i^2 + \sum_{j=1}^n \left(-\frac{\eta}{4} \gamma_j^2 + \theta\right) z_j,$$

where  $\gamma = c + V\sqrt{\Lambda}\alpha + A^\top\beta$  and  $\gamma_j$  is the  $j$ -th element of  $\gamma$ . Rewriting the summations using norm and matrix multiplications completes the proof.  $\square$

**Lemma C.2** (Closed-form minimizer). *Given any pair  $(\alpha, \beta)$ , the minimizer of the function  $H$  defined in (C.1) can be computed as*

$$\arg \min_{z \in \{0,1\}^n} H(z, \alpha, \beta) = \mathbb{I}\left\{\frac{\eta}{4} \text{diag}((c + V\sqrt{\Lambda}\alpha + A^\top\beta)(c + V\sqrt{\Lambda}\alpha + A^\top\beta)^\top) > \theta\right\},$$

where  $\mathbb{I}$  is the component-wise indicator function and the  $\text{diag}$  operator here returns the vector of diagonal elements of the input matrix.

This lemma immediately follows from (C.1).

## References

Bertsimas, D. and van Parys, B. Sparse high-dimensional regression: Exact scalable algorithms and phase transitions. *The Annals of Statistics*, 48:300–323, 2017.
